# Supplementary material for: Analytical evaluation and bioclinical validation of new aldosterone and renin immunoassays
Source: publisher site journal article supplement (doi:10.1515/cclm-2022-0576), 2022-09-12
Supplement: Supplementary file 1 [file j_cclm-2022-0576_suppl_001.docx]

**Supplemental Figure 1.** Comparison between EDTA-plasma samples and heparinised plasma samples for Lumipulse® G Aldosterone assay (A and B) and Lumipulse® G Renin assay (C and D): Passing and Bablok analysis (A and C) and Bland-Altman analysis (B and D).

**Supplemental Figure 2.** Comparison between EDTA-plasma samples and serum samples for Lumipulse® G Aldosterone assay (A and B) and Lumipulse® G Renin assay (C and D): Passing and Bablok analysis (A and C) and Bland-Altman analysis (B and D).
